# Supplementary material for: Citizen science and roadkill trends in the Korean herpetofauna: The importance of spatially biased and unstandardized data
Source: Frontiers journal article supplement (doi:10.3389/fevo.2022.944318), 2022-08-12
Supplement: Data_Sheet_1.zip [file Supplementary Figures.pdf › Supplementary Figures.pdf]

## Supplementary Figures

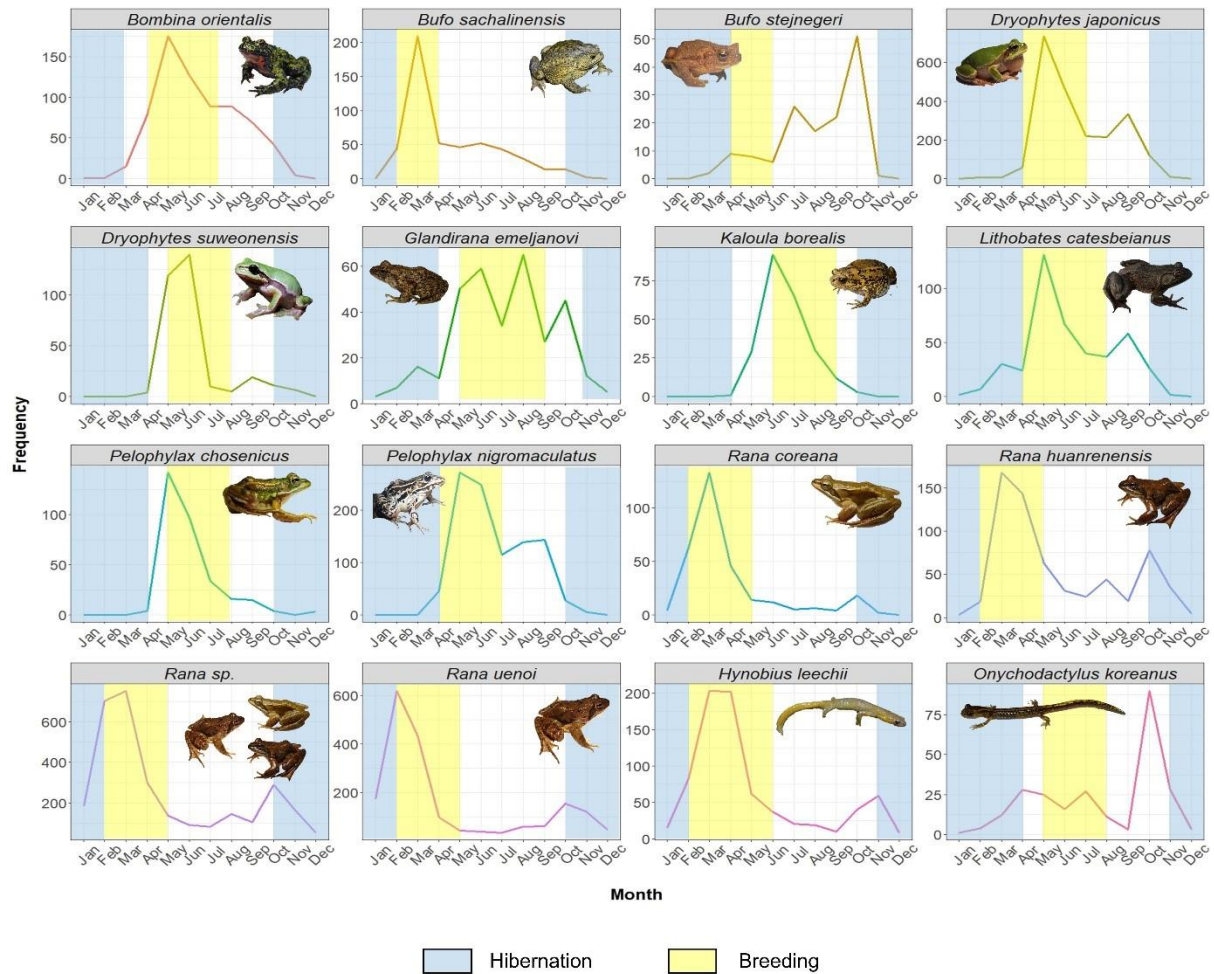

Figure S1. The trends of total monthly observation frequencies of the amphibian species represented in the iNaturalist roadkill dataset. The temporal timeframe for the collection of total observation data is matched with that of the roadkill data, spanning from 1 January 2005 to 13 August 2020. For most species, the peak of observation frequency generally corresponds to known breeding periods. However, such a pattern does not hold for species with specialized breeding ecologies (e.g. *Bufo stejnegeri* and *Onychodactylus koreanus*; see text for further explanations). Photographs of amphibians by AB.

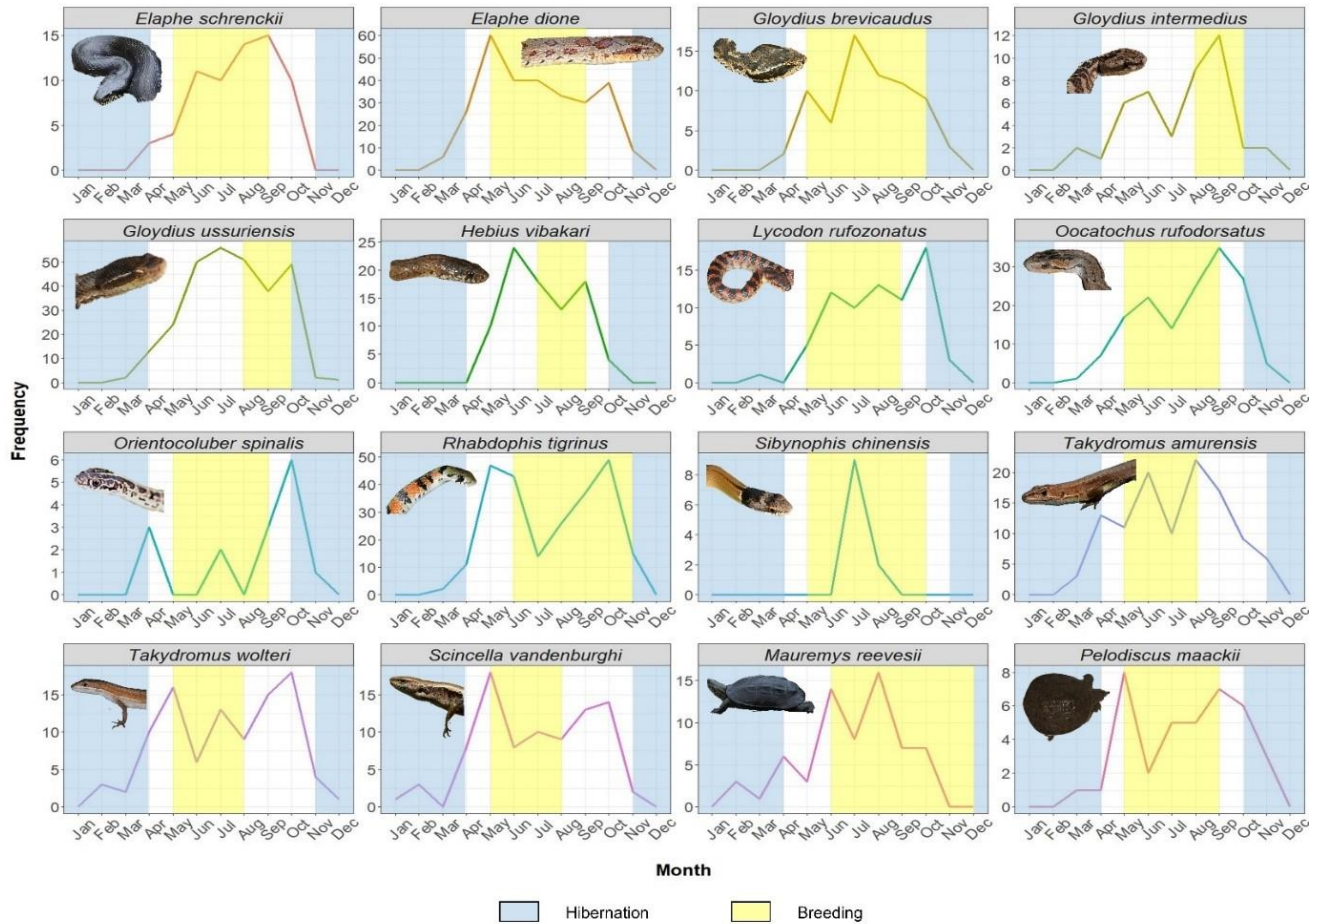

Figure S2. The trends of total monthly observation frequencies of the reptile species represented in the iNaturalist roadkill dataset. The temporal timeframe for the collection of total observation data is matched with that of the roadkill data, spanning from 1 January 2005 to 13 August 2020. In general, the highest peak of total observation frequency either corresponds to or closely matches the breeding seasons, and a second, smaller peak generally corresponds to a period immediately preceding the hibernation periods. However, such a pattern is difficult ascertain for the species with very small sample sizes (e.g., for the two turtle species). Photographs of reptiles courtesy of Hyun-Tae Kim, modified and used under permission.
