# Supplementary material for: Citizen science and roadkill trends in the Korean herpetofauna: The importance of spatially biased and unstandardized data
Source: Frontiers journal article supplement (doi:10.3389/fevo.2022.944318), 2022-08-12
Supplement: Data_Sheet_1.zip [file Supplementary Tables.pdf › Supplementary Tables.pdf]

## Supplementary Tables

Table S1. The list of literature used generate the literature-based roadkill dataset, shown together with study type and publishing organization (if applicable). See References section for the full citations.

| Study             | Study type             | Publishing organization                        |
|-------------------|------------------------|------------------------------------------------|
| Cho, 2011         | Thesis                 | Woosuk University                              |
| Kim et al., 2017b | Conference proceedings | -                                              |
| Kim et al., 2018b | Research article       | -                                              |
| KNPRI, 2012       | Research report        | Korea National Park Research Institute         |
| Koo et al., 2018  | Research article       | -                                              |
| Min and Han, 2010 | Research article       | -                                              |
| Park et al., 2017 | Research article       | -                                              |
| Song et al., 2009 | Research article       | -                                              |
| Won et al., 2005  | Research report        | National Institute of Ecological Research      |
| Yang et al., 2006 | Research report        | National Institute of Ecological Research      |
| MOE, 2006         | Research report        | Ministry of Environment, Daegu Regional Office |

Table S2. The assignment of breeding season groupings to each amphibian species recorded in the iNaturalist dataset. We used this grouping scheme for the analysis of monthly roadkill trends according to the breeding ecology. *Onychodactylus koreanus* and *Bufo stejnegeri* have either poorly known or specialized breeding ecologies that do not fit the spring-summer groupings. Thus, we excluded these two species from the analysis (n/a) of monthly roadkill trends according to breeding seasons.

| Species                          | Breeding season grouping |
|----------------------------------|--------------------------|
| <i>Hynobius leechii</i>          | Spring                   |
| <i>Bufo sachalinensis</i>        | Spring                   |
| <i>Rana coreana</i>              | Spring                   |
| <i>Rana huanrenensis</i>         | Spring                   |
| <i>Rana uenoi</i>                | Spring                   |
| <i>Rana sp.</i>                  | Spring                   |
| <i>Bombina orientalis</i>        | Summer                   |
| <i>Dryophytes japonicus</i>      | Summer                   |
| <i>Dryophytes suweonensis</i>    | Summer                   |
| <i>Kaloula borealis</i>          | Summer                   |
| <i>Pelophylax nigromaculatus</i> | Summer                   |
| <i>Pelophylax chosenicus</i>     | Summer                   |
| <i>Glandirana emeljanovi</i>     | Summer                   |
| <i>Lithobates catesbeianus</i>   | Summer                   |
| <i>Onychodactylus koreanus</i>   | n/a                      |
| <i>Bufo stejnegeri</i>           | n/a                      |
